# Supplementary material for: Extending the electron spin coherence time of atomic hydrogen by dynamical decoupling
Source: Royal Society of Chemistry journal article supplement (doi:10.1039/c3cp53423e), 2013-11-27
Supplement: c3cp53423e.pdf [file c3cp53423e.pdf]

## Electronic Supplementary Information

for the manuscript

### Extending the Electron Spin Coherence Time of Atomic Hydrogen by Dynamical Decoupling by

George Mitrikas, Eleni K. Efthimiadou, and George Kordas

*Institute of Advanced Materials, Physicochemical Processes, Nanotechnology and Microsystems, NCSR  
Demokritos, 15310 Athens, Greece*

email: mitrikas@ims.demokritos.gr

## 1 Sample Preparation

Octakis (trimethylsilyloxy) silsesquioxane ( $\text{Si}_8\text{O}_{12}(\text{OSiMe}_3)_8$  or  $\text{Q}_8\text{M}_8$ , CAS 51777-38-9) was prepared following a two-step process:

**Octaanion salt synthesis (1):** The octaanion  $[\text{Si}_8\text{O}_{20}^{8-}] \cdot 8[\text{Me}_4\text{N}]^+$  was prepared according to Hagiwara et al. [1]. The mixture of TEOS/TMAOH/ $\text{H}_2\text{O}$ /EtOH in molar ratio 1/1/10/10 was left for vigorous stirring for 3 days. After this reaction time, the mixture was concentrated and cooled. Hydrated crystals of the octaanion were observed. These crystals were dehydrated after heating at 60 °C in high pressure vacuum. 1g of the isolated product was dissolved in a mixture of pyridine/THF (150/100) which were pretreated in an ice bath. After 30 min stirring the unreacted products were removed under reduced pressure. A portion of HCl was added to neutralize the pyridine excess. The precipitated salt was isolated with filtration becoming a clear solution. The liquid was concentrated and the octaanion salt resulted.

**$[\text{Si}_8\text{O}_{20}][\text{Si}(\text{CH}_3)_3]_8$  (2):** Trimethylchlorosilane (22.0 ml, 0.189 mol) was added in hexane (120 ml) and the mixture was stirred for 30 min at 0 °C. The flask equipped with a reflux condenser and an additional funnel aiming at adding the octaanion butanol solution dropwise (1.0 g octaanion in 50.0 ml butanol) under  $\text{N}_2$  during 30 minutes period. The reaction was left for stirring additional 30 minutes and after that the mixture was extracted with hexane/brine twice and the organic layer was recovered. The organic layer was dried over  $\text{Na}_2\text{SO}_4$ . The hexane was concentrated to give a white solid in a good yield. Compound 2 was characterized by FT-IR and their characteristic peaks are: Si-O-Si at 1100  $\text{cm}^{-1}$ , Si-CH<sub>3</sub> at 1260  $\text{cm}^{-1}$  [2].

## 2 Theory and Simulations

The numerical calculation of the CPMG signal can in principle be done using the spin Hamiltonian of the electron-nuclear coupled spin system under the unitary transformations of the pulse train. While this is straightforward for one  $^{29}\text{Si}$  nucleus, it becomes virtually impossible for  $^1\text{H}$  nuclear spins due to their large number and the wide distribution of their magnetic parameters. Therefore, for the latter case we assumed a Gaussian function for the noise spectral density of the  $^1\text{H}$  nuclear spin bath and the calculation of the CPMG decay was done by considering the filter function of the pulse train.

### 2.1 Echo modulations due to coupling with a single inner-cage $^{29}\text{Si}$ spin

The rotating frame spin Hamiltonian is given by [3]

$$\mathcal{H}_0 = \Omega_S S_z + \omega_I I_z + A S_z I_z + B S_z I_x, \quad (1)$$

where  $\Omega_S = \omega_S - \omega_{mw}$  is the offset of the electron Zeeman frequency  $\omega_S = g\beta_e B_0/\hbar$  from the mw frequency  $\omega_{mw}$ ,  $\omega_I = -g_n\beta_n B_0/\hbar$  is the nuclear Zeeman frequency,  $g$  and  $g_n$  are the electron and nuclear g-factors,  $\beta_e$  and  $\beta_n$  are the Bohr and nuclear magnetons,  $B_0$  is the static magnetic field along  $z$ -axis, and  $A$ ,  $B$  describe the secular and pseudo-secular part of the hyperfine coupling. For an axially symmetric hyperfine coupling tensor,  $[A_\perp, A_\perp, A_\parallel] = [a_{\text{iso}} - T, a_{\text{iso}} - T, a_{\text{iso}} + 2T]$ , where  $a_{\text{iso}}$  and  $T$  are the isotropic and anisotropic part of the hyperfine interaction, we have

$$A = a_{\text{iso}} + T(3\cos^2\theta - 1), \quad B = 3T\cos\theta\sin\theta, \quad (2)$$

with  $\theta$  being the angle between the static magnetic field  $B_0$  and the  $z$ -principal direction of the hyperfine tensor. Starting from the equilibrium density operator  $\sigma_{\text{eq}} = -S_z$ , the first  $(\pi/2)_x$  pulse creates electron

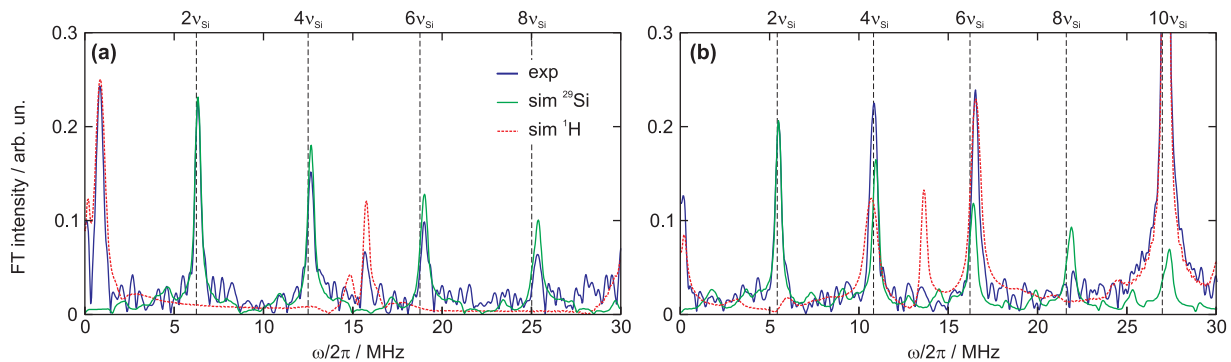

FIG. S1: (Color online) Absolute value FT spectra of experimental (blue lines) and separately simulated (green- $^{29}\text{Si}$ , red- $^1\text{H}$ ) signals of the last echo of a CPMG sequence with  $N = 10$ . (a) High-field EPR transition,  $B_0 = 369.5$  mT. (b) Low-field EPR transition,  $B_0 = 318.6$  mT. Black dashed lines denote even harmonics of  $\nu_{\text{Si}}$ .

spin coherence  $\sigma_0 = R_x^{-1}(\pi/2)\sigma_{\text{eq}}R_x(\pi/2)$ , where  $R_x(\pi/2) = \exp[-i\pi/2S_x]$ . After the  $N'$ th  $(\pi)_y$ -pulse the echo intensity is given by

$$\langle\sigma_y\rangle_{\text{Si}} = \text{Re Tr}(S_y\sigma_N), \quad (3)$$

where  $\sigma_N$  is the density matrix at the time of the  $N'$ th echo formation,  $t = 2N\tau$ ,

$$\sigma_N = U_\tau^{-1}R_y^{-1}(\pi)U_\tau^{-1}\sigma_{N-1}U_\tau R_y(\pi)U_\tau, \quad (4)$$

and  $U_\tau = \exp[-i\mathcal{H}_0\tau]$  is the propagator of free evolution.

From our previous HYSORE study [4] we obtained  $a_{\text{iso}} \simeq -2$  MHz and  $T \simeq -0.6$  MHz for the inner  $^{29}\text{Si}$  cage atoms. We used these values as starting point for the simulations which included integration over all possible orientations. Refinement of the parameters gave  $a_{\text{iso}} = -2.2$  MHz and  $T = -0.65$  MHz that reproduced very well the position and intensity of peaks close to even harmonics of  $\nu_{\text{Si}}$  (see Fig. S1). Note that the high-field spectrum is more appropriate for this comparison because most of the  $^{29}\text{Si}$  peaks do not overlap with  $^1\text{H}$  harmonics.

## 2.2 Echo modulations due to coupling with the $^1\text{H}$ spin bath

We treat the surrounding  $^1\text{H}$  nuclear spin bath as a source of classical noise with spectral density  $S(\omega)$ , i.e. a fluctuating magnetic field whose frequency is peaked at the  $^1\text{H}$  Larmor frequency  $\nu_H$  and distributed according to  $S(\omega)$ . The coherence decay is given by [5]

$$\langle\sigma_x\rangle_H = \exp(-\chi(t)) \quad \text{with} \quad \chi(t) = \int_0^\infty \frac{d\omega}{2\pi} S(\omega) |\tilde{f}(t; \omega)|^2, \quad (5)$$

where  $\tilde{f}(t; \omega)$  is the filter function of the pulse sequence given by the Fourier transform of the function  $f(t, t')$  with respect to  $t'$ ,

$$\tilde{f}(t; \omega) = \int_{-\infty}^\infty f(t, t') e^{-i\omega t'} dt'. \quad (6)$$

For the CPMG sequence the function  $f(t, t')$  is the Heaviside step function shown in Fig. S2 for  $N = 4$ . For the  $^1\text{H}$  spectral density we assumed a Gaussian distribution of width  $\sigma$ ,

$$S(\omega) = \lambda^2 \frac{1}{\sigma\sqrt{2\pi}} \exp\left[-\frac{(\omega - \omega_L)^2}{2\sigma^2}\right], \quad (7)$$

where  $\omega_L$  is the  $^1\text{H}$  Larmor frequency and  $\lambda$  is the coupling strength parameter having units of angular frequency. Another useful representation of this noise is through the magnetic field sensitivity,  $S_B(\omega)$ , defined as

$$S_B(\omega) = \frac{2\pi}{\gamma_e} \sqrt{\frac{S(\omega)}{2\pi}}, \quad (8)$$

where  $\gamma_e/2\pi = 28.025 \times 10^9$  Hz/T is the gyromagnetic ratio and  $S_B(\omega)$  has units of T/ $\sqrt{\text{Hz}}$ . Fig. 3(c) in main text shows noise spectral densities in this representation.

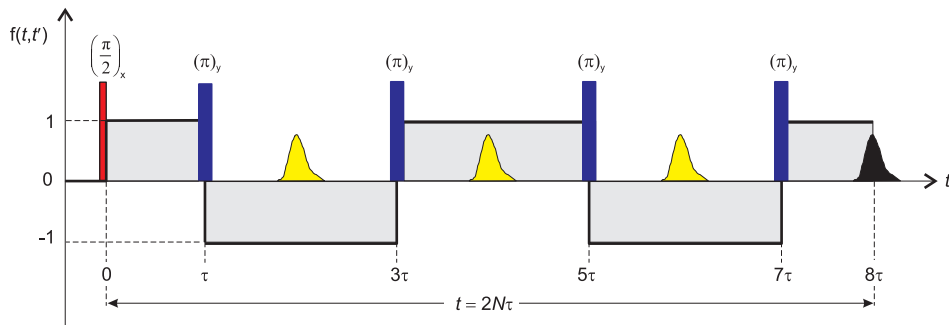

FIG. S2: (Color online) CPMG sequence for  $N = 4$  and the corresponding function  $f(t, t')$ .

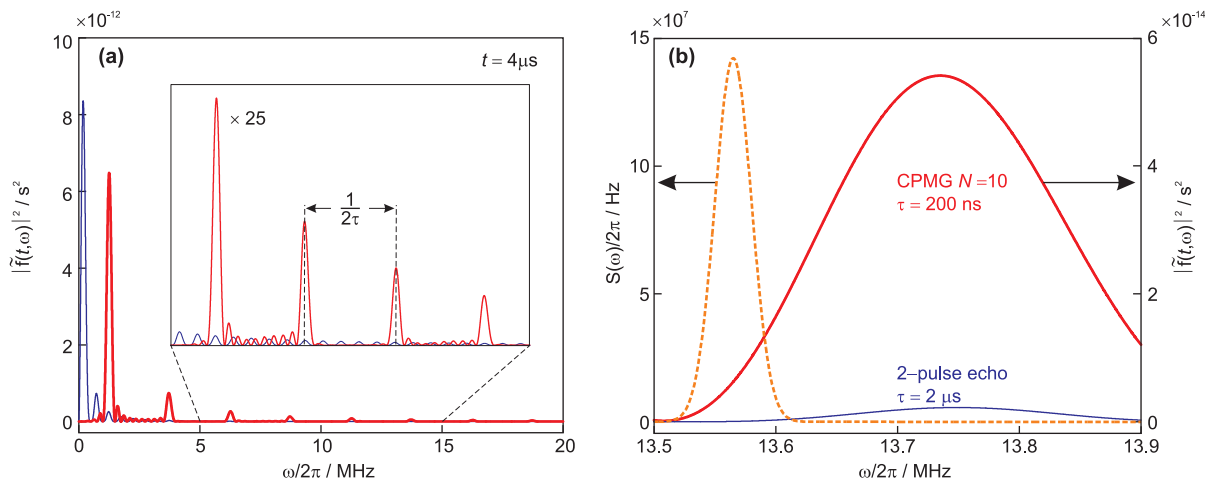

FIG. S3: (Color online) (a) Comparison of the filter functions for  $t = 4 \mu s$  between the two-pulse echo (blue thin line) and CPMG with  $N = 10$  (red thick line). (b) Details of the filter functions in the high frequency region together with the simulated  $^1H$  spectral density (orange dashed line) for the low-field EPR transition.

Fig. S3 compares the filter functions of the two-pulse echo and CPMG sequence with  $N = 10$  for the same time evolution  $t = 4 \mu s$ . Fig. S3(a) shows that, compared to two-pulse, the CPMG sequence not only suppresses low-frequency noise but also exhibits peaks at the high-frequency region where the  $^1H$  noise appears. When the filter and noise spectral density functions overlap (Fig. S3(b)), additional decoherence occurs.

### 2.3 Overall simulation of echo modulations

The total echo modulation is calculated as the product  $\langle \sigma_x \rangle_H \langle \sigma_x \rangle_{Si}$  taking into account the natural abundance 4.68% of  $^{29}Si$ . Considering only the  $Si_8O_{12}$  core of the POSS cage, the binomial distribution predicts that  $c_0 = 68.13\%$  of the cages have no  $^{29}Si$  atom. Therefore, these species contribute only to  $^1H$  modulations. The rest  $c = 31.87\%$  of the cages have one ( $c_1 = 26.78\%$ ), two ( $c_2 = 4.61\%$ ), three ( $c_3 = 0.45\%$ ), four ( $c_4 = 0.03\%$ ) etc.  $^{29}Si$  atom(s) in the core and therefore contribute also to  $^{29}Si$  modulations. Assuming that all eight  $^{29}Si$  atoms are magnetically equivalent, the total echo modulation is given by

$$\langle \sigma_x \rangle = \sum_{j=0}^8 c_j \langle \sigma_x \rangle_H [\langle \sigma_x \rangle_{Si}]^j \quad (9)$$

We notice that Eq. 9 is valid only when the orientations of the eight  $^{29}Si$  nuclei are uncorrelated. However, due to the symmetry of the problem (we assume axially symmetric hyperfine tensors with their  $z$ -principal axis oriented towards the centre of the cube), it can be proved that Eq. 9 is indeed an excellent approximation. In our simulations we used only the first four terms of Eq. 9 (up to  $j = 3$ ) because the rest of them have negligible contribution. Fig. S4 (green thick lines) shows the contribution of  $^{29}Si$  modulations to the total signal along with the experimental data. Setting  $\lambda$  and  $\sigma$  as free varying parameters, the noise spectral densities were obtained by minimizing the sum of the residuals. The results gave  $\lambda = 1.53 \pm 0.05 \times 10^7$  rad/s and  $\sigma/2\pi = 14.8 \pm 0.5$  kHz for the high-field, and  $\lambda = 1.45 \pm 0.05 \times 10^7$  rad/s and  $\sigma/2\pi = 15.0 \pm 0.5$  kHz

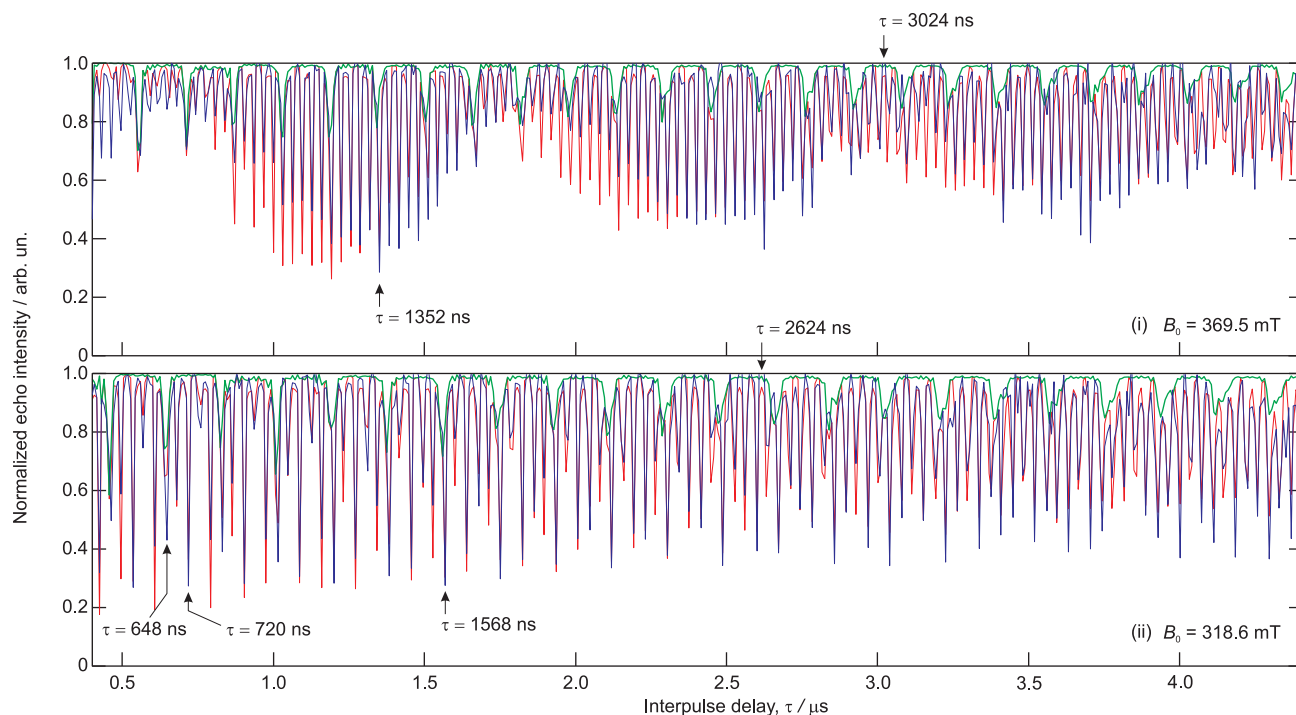

FIG. S4: (Color online) Baseline-corrected CPMG decays obtained with  $N = 10$  (blue traces) and their numerical simulations (red traces) for the two EPR transitions. Green traces are the contribution of  $^{29}\text{Si}$  modulations to the total signal. Arrows mark the  $\tau$  values used in measurements shown in Fig.4

for the low-field EPR transitions. This broadening corresponds to static magnetic field  $B_0$  inhomogeneity of about 0.3 mT which is much larger than the instrumental magnetic field inhomogeneity (using the same amount of sample the resolution of the liquid-state EPR spectrum acquired with the same spectrometer was about 10  $\mu\text{T}$ ). Therefore, we can assign this linewidth to inhomogeneous broadening of the proton nuclear spin spectrum. Moreover, the obtained  $\sigma$  values are comparable to the dipolar couplings between methyl group protons, i.e. 20 kHz, showing that nuclear spin flip-flops driven by dipolar interactions are indeed quite probable.

The simulations of the “static” (performed with constant  $\tau$  values) CPMG decays in Fig.4 (main text) were done with the same way as for Fig.3 (i.e. using Eq. 9) including also an exponential function of the form  $\exp(-t/T_2)$  in order to reproduce the  $T_2 = 56 \mu\text{s}$  decay of the signal that is observed for  $\tau$  values that lead to maximum echo revival (e.g.  $\tau = 3320$  ns for the low-field EPR transition).

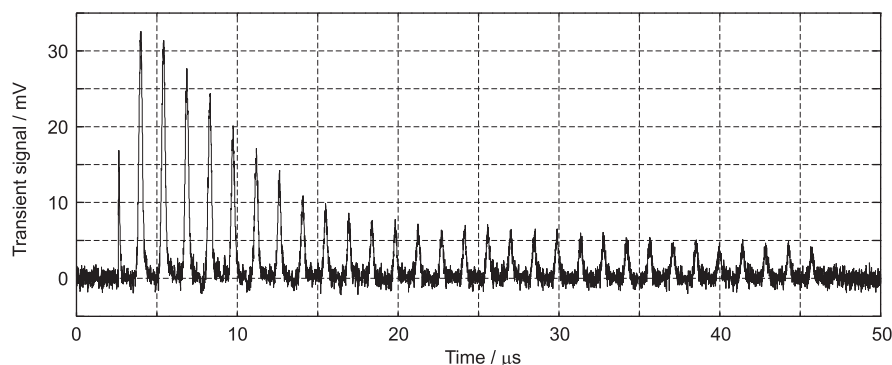

FIG. S5: (Color online) Oscilloscope-recorded CPMG time trace for  $N = 30$  and  $\tau = 720$  ns. The echo intensities are represented by  $\diamond$  symbols in Fig.4(b) (main text). Number of averaged measurements, 1024; total acquisition time, 30 s; number of points, 25045; time resolution, 2 ns. The trace is the difference between on- and off-resonance signals in order to remove unwanted baseline artifacts induced by microwave pulses.

For CPMG experiments with constant  $\tau$  values the measurements were recorded with a HP Infinium 54810A oscilloscope which allowed the acquisition of the entire time trace in a single shot (see Fig. S5).

All measurements were performed with repetition rates smaller than  $1/5T_1 = 1.5$  kHz in order to avoid saturation.

## References

- [1] Y. Hagiwara, A. Shimojima, and K. Kuroda, Chem. Mater. **20**, 1147 (2008).
- [2] I. Hasegawa, W. Imamura, and T. Takayama, Inorg. Chem. Commun. **7**, 513 (2004).
- [3] A. Schweiger and G. Jeschke, *Principles of Pulse Electron Paramagnetic Resonance* (Oxford Univ. Press, New York, 2001).
- [4] G. Mitrikas, Phys. Chem. Chem. Phys. **14**, 3782 (2012).
- [5] L. Cywiński, R. M. Lutchyn, C. P. Nave, and S. Das Sarma, Phys. Rev. B **77**, 174509 (2008).
